# Supplementary material
Source: PubMed Central journal article supplement (PMC3143648)
Supplement: supp_M111.262162_jbc.M111.262162-1.pdf [file supp_M111.262162_jbc.M111.262162-1.pdf]

**Supplemental Figure 1**  
**Wild-type and *xpt1* $\Delta$  mutant cells show similar capsule morphology**

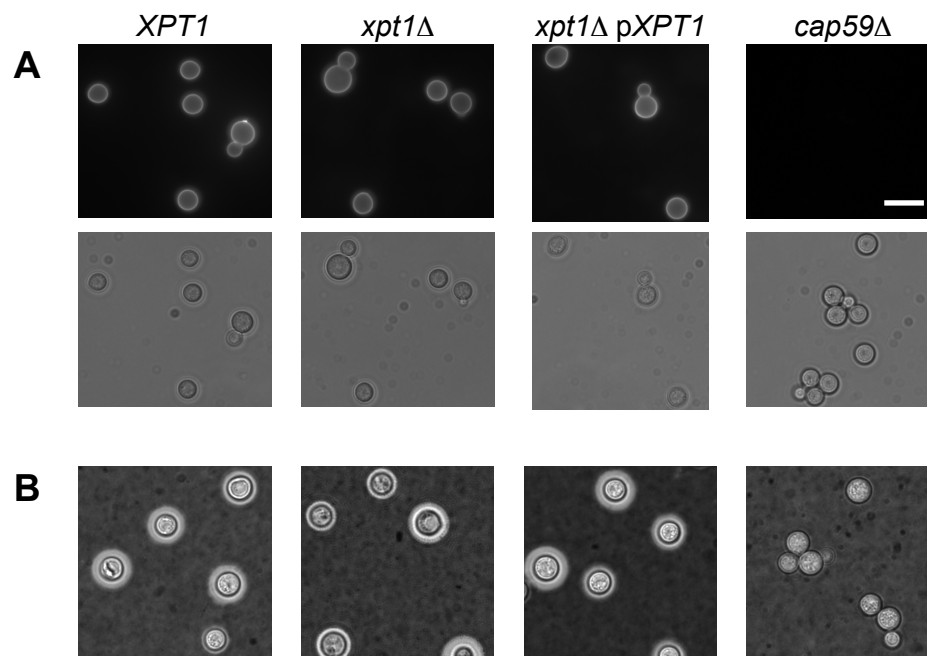

**Panel A**, immunofluorescence microscopy of the indicated strains labeled with monoclonal antibody F12D2 as in the Experimental Procedures. Bright field (upper) and fluorescent (lower) images are shown.

**Panel B**, bright field image of the indicated strains grown under capsule-inducing conditions and then mixed with India Ink (see Experimental Procedures). Bar, 10 Microns.
